# Supplementary material for: Social Media Sensationalism in the Male Infertility Space: A Mixed Methodology Analysis
Source: PubMed Central journal article supplement — World J Mens Health. 2020 Apr 10;38(4):591–8. doi: 10.5534/wjmh.200009 (PMC7502321; doi:10.5534/wjmh.200009), 2020-04-10
Supplement: wjmh-38-591-s001.pdf [file wjmh-38-591-s001.pdf]

**Supplement Table.** Quality rating designated independently by two independent reviewers with training in critical evaluation of literature

| Link title                                                                                                                                                                   | Reviewer 1 | Reviewer 2 | Final ratings |
|------------------------------------------------------------------------------------------------------------------------------------------------------------------------------|------------|------------|---------------|
| Chemical pollutants in the home degrade fertility in both men and dogs, study finds                                                                                          | 0          | 0          | 0             |
| Marijuana improves fertility in men, beats colorectal cancer, chronic pain   The Guardian Nigeria News                                                                       | 2          | 2          | 2             |
| Chemicals found at home are responsible for decrease in fertility in dogs and men                                                                                            | 0          | 0          | 0             |
| Chemical pollutants in the home degrade fertility in both men and dogs, study finds                                                                                          | 0          | 2          | 0             |
| Marijuana could affect fertility in women AND men, researchers warn                                                                                                          | 2          | 2          | 2             |
| Be in bed before 10:30 if you want to have kids, men told following new study linking lack of sleep to poor fertility                                                        | 0          | 0          | 0             |
| Chemical pollutants in the home degrade fertility in both men and dogs, study finds                                                                                          | 0          | 0          | 0             |
| Men may be more fertile in spring and autumn because sperm is 'seasonal'                                                                                                     | 0          | 0          | 0             |
| Marijuana's unexpected effect on sperm count revealed in Harvard study                                                                                                       | 2          | 2          | 2             |
| Junk food diet linked to lower sperm counts, researchers say                                                                                                                 | 2          | 2          | 2             |
| Men who smoke marijuana have higher sperm count: Harvard study                                                                                                               | 2          | 2          | 2             |
| Staying up late watching Netflix and reading emails hits men's sperm count                                                                                                   | 2          | 2          | 2             |
| Smoking cannabis linked to higher sperm counts in surprising study                                                                                                           | 2          | 2          | 2             |
| Men who smoke marijuana have higher sperm count, Harvard study...                                                                                                            | 0          | 1          | 1             |
| Men who smoke weed have higher sperm count: Harvard study                                                                                                                    | 2          | 2          | 2             |
| Weed smokers may have higher sperm counts, Harvard study finds                                                                                                               | 2          | 2          | 2             |
| Men who smoke cannabis have HIGHER sperm counts – 3 news                                                                                                                     | 2          | 2          | 2             |
| Revealed: Ugali can reduce your sperm count                                                                                                                                  | 0          | 0          | 0             |
| Gardasil and male infertility - Vaxxter                                                                                                                                      | 1          | 1          | 1             |
| Climate change reduces male fertility, could help drive extinction   Environment                                                                                             | 0          | 0          | 0             |
| The silent shame of male infertility                                                                                                                                         | 2          | 2          | 2             |
| Male Infertility: In almost 50% infertility cases, the reason is male infertility!                                                                                           | 2          | 2          | 2             |
| Male infertility   Causes   Symptoms   Treatments - Omni Hospitals                                                                                                           | 2          | 2          | 2             |
| Company develops testicle cooler to fight male infertility                                                                                                                   | 0          | 1          | 1             |
| The male fertility crisis continues: Quality of sperm plummets                                                                                                               | 0          | 2          | 2             |
| Major study finds quality of men's sperm is plunging                                                                                                                         | 0          | 0          | 0             |
| Human race could face extinction if sperm quality continues to fall                                                                                                          | 2          | 0          | 0             |
| How to improve sperm quality: Men need to sleep early                                                                                                                        | 0          | 0          | 0             |
| In the past 80 years, the quality of human sperm has declined by 50% - The Intellectualist                                                                                   | 2          | 2          | 2             |
| Sperm quality study updates advice for couples trying to conceive                                                                                                            | 2          | 2          | 2             |
| Sperm quality is falling. Chemicals in your home may be to blame.                                                                                                            | 0          | 0          | 0             |
| Young men with Western diets 'have poorer quality sperm and drastically lower counts'                                                                                        | 2          | 2          | 2             |
| Infertility: Low swiss semen quality highlights a worldwide sperm trend                                                                                                      | 2          | 2          | 2             |
| MMR vaccine's poison pill: Mumps after puberty, reduced testosterone and sperm counts                                                                                        | 1          | 1          | 1             |
| How fat gain in your 20s can lead to low testosterone levels fall in sperm count                                                                                             | 0          | 0          | 0             |
| Smoking a small amount of pot may boost sperm and testosterone, surprised researchers find                                                                                   | 2          | 2          | 2             |
| Could bariatric surgery make men more virile? Researchers find that weight loss surgery may boost levels of testosterone in men, but has no positive effect on sperm quality | 2          | 2          | 2             |
| Smoking small amount of weed may boost testosterone and sperm production   iHeartRadio                                                                                       | 2          | 2          | 2             |
| The date palm found to increase sperm count and motility                                                                                                                     | 2          | 0          | 0             |
| Activation of Toll-like receptor 7/8 encoded by the X chromosome alters sperm motility and provides a novel simple technology for sexing sperm                               | 2          | 2          | 2             |
| Sperm preparation for Intrauterine Insemination/Sperm preparation/swim up technique/STAR LABORATORY                                                                          | 2          | 2          | 2             |
| Sperm counts decreasing at alarming rate, new antioxidant study shows 122% increase in sperm motility and 33% increase in sperm count                                        | 0          | 2          | 2             |
| Supplementing with omega-3 can improve sperm motility and quality of seminal plasma                                                                                          | 2          | 2          | 2             |
| Semen analysis: Sperm counting test procedure and results                                                                                                                    | 2          | 2          | 2             |

**Supplement Table.** Continued

| Link title                                                      | Reviewer 1 | Reviewer 2 | Final ratings |
|-----------------------------------------------------------------|------------|------------|---------------|
| Normal sperm count: A guide to semen analysis                   | 0          | 0          | 0             |
| Semen analysis and infertility in men - The Nation Newspaper    | 2          | 2          | 2             |
| Routine semen analysis (RSA)                                    | 2          | 2          | 2             |
| Climate change could damage sperm and thus male fertility       | 0          | 0          | 0             |
| Fertility paradox in male beauty quest                          | 2          | 2          | 2             |
| Study reveals that Wi-Fi devices affect male fertility          | 1          | 2          | 2             |
| There's a testicle cooling device for increasing male fertility | 0          | 1          | 1             |
| Cannabis users beware: Marijuana use may impact male fertility  | 0          | 0          | 0             |

Ratings included inaccurate – 1, misleading – 0, and accurate – 2. The senior authors were blinded to the two reviewer decisions and adjudicated all discordances and determined final ratings.
